# Supplementary material
Source: publisher figshare collection journal article supplement (https://karger.figshare.com/articles/dataset/_/19383482)
Supplement: Supplementary file 1 [file 1]

Supplementary figure 1. PRISMA 2020 flow diagram for new systematic reviews which included searches of databases, registers and other sources.

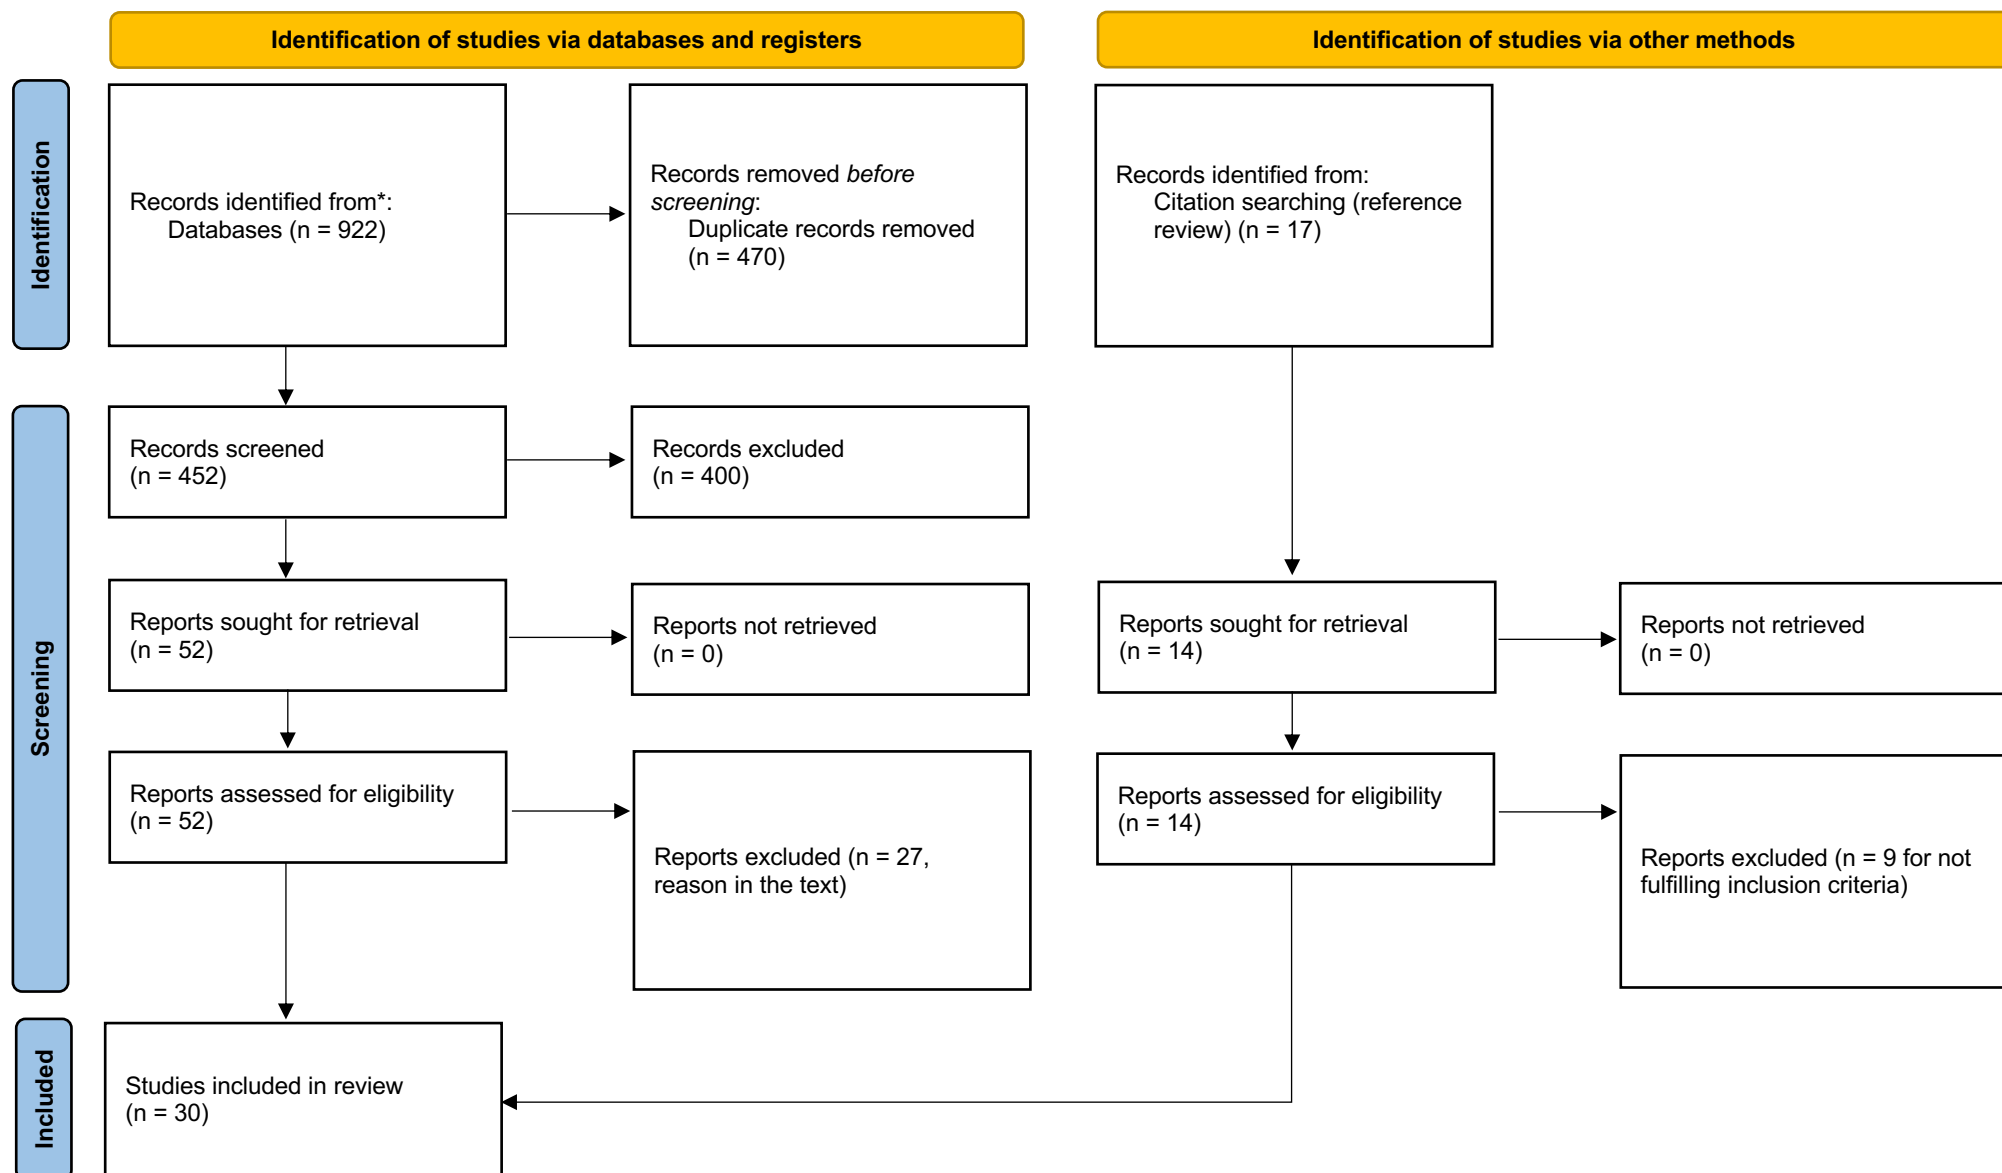

PRISMA 2020 flow diagram for new systematic reviews which included searches of databases, registers and other sources. Flow chart of the inclusion process based on the "PRISMA 2020 flow diagram" (see reference 4). From: Page MJ, McKenzie JE, Bossuyt PM, Boutron I, Hoffmann TC, Mulrow CD, et al. The PRISMA 2020 statement: an updated guideline for reporting systematic reviews. BMJ 2021;372:n71. doi: 10.1136/bmj.n71. For more information, visit: <http://www.prisma-statement.org/>
